# Supplementary material for: Luminescence and energy transfer properties of novel Na2.5Y0.5Mg7(PO4)6: R (R = Eu2+, Tb3+ and Mn2+) phosphors
Source: Royal Society of Chemistry journal article supplement (doi:10.1039/c5dt04735h), 2016-01-01
Supplement: c5dt04735h1.pdf [file c5dt04735h1.pdf]

### Supplementary information

Table 1 The CIE chromaticity coordinates (X, Y) of NYMPO<sub>4</sub>: 2%Eu<sup>2+</sup>, zTb<sup>3+</sup>, y Mn<sup>2+</sup> (λ<sub>ex</sub> = 365 nm)

| Composition                                                                          | CIE (X, Y) |
|--------------------------------------------------------------------------------------|------------|
| NMYPO <sub>4</sub> : 2%Eu <sup>2+</sup> , 3%Mn <sup>2+</sup>                         | 0.18, 0.06 |
| NMYPO <sub>4</sub> : 2%Eu <sup>2+</sup> , 6%Mn <sup>2+</sup>                         | 0.21, 0.08 |
| NMYPO <sub>4</sub> : 2%Eu <sup>2+</sup> , 9%Mn <sup>2+</sup>                         | 0.22, 0.09 |
| NMYPO <sub>4</sub> : 2%Eu <sup>2+</sup> , 12%Mn <sup>2+</sup>                        | 0.23, 0.10 |
| NMYPO <sub>4</sub> : 2%Eu <sup>2+</sup> , 15%Mn <sup>2+</sup>                        | 0.25, 0.12 |
| NMYPO <sub>4</sub> : 2%Eu <sup>2+</sup> , 5%Tb <sup>3+</sup>                         | 0.17, 0.06 |
| NMYPO <sub>4</sub> : 2%Eu <sup>2+</sup> , 10%Tb <sup>3+</sup>                        | 0.19, 0.17 |
| NMYPO <sub>4</sub> : 2%Eu <sup>2+</sup> , 15%Tb <sup>3+</sup>                        | 0.20, 0.24 |
| NMYPO <sub>4</sub> : 2%Eu <sup>2+</sup> , 20%Tb <sup>3+</sup>                        | 0.22, 0.31 |
| NMYPO <sub>4</sub> : 2%Eu <sup>2+</sup> , 25%Tb <sup>3+</sup>                        | 0.22, 0.36 |
| NMYPO <sub>4</sub> : 2%Eu <sup>2+</sup> , 30%Tb <sup>3+</sup>                        | 0.25, 0.48 |
| NYMPO <sub>4</sub> : 2%Eu <sup>2+</sup> , 20%Tb <sup>3+</sup> , 1% Mn <sup>2+</sup>  | 0.25, 0.47 |
| NYMPO <sub>4</sub> : 2%Eu <sup>2+</sup> , 20%Tb <sup>3+</sup> , 2% Mn <sup>2+</sup>  | 0.26, 0.44 |
| NYMPO <sub>4</sub> : 2%Eu <sup>2+</sup> , 20%Tb <sup>3+</sup> , 4% Mn <sup>2+</sup>  | 0.27, 0.41 |
| NYMPO <sub>4</sub> : 2%Eu <sup>2+</sup> , 20%Tb <sup>3+</sup> , 6% Mn <sup>2+</sup>  | 0.28, 0.38 |
| NYMPO <sub>4</sub> : 2%Eu <sup>2+</sup> , 20%Tb <sup>3+</sup> , 8% Mn <sup>2+</sup>  | 0.30, 0.35 |
| NYMPO <sub>4</sub> : 2%Eu <sup>2+</sup> , 20%Tb <sup>3+</sup> , 10% Mn <sup>2+</sup> | 0.30, 0.33 |
